# Supplementary material for: Glycosylation profiling of triple-negative breast cancer: clinical and immune correlations and identification of LMAN1L as a biomarker and therapeutic target
Source: Frontiers journal article supplement (doi:10.3389/fimmu.2024.1521930), 2025-01-10
Supplement: Data_Sheet_1.pdf [file Data_Sheet_1.pdf]

## Supplementary Figures

A

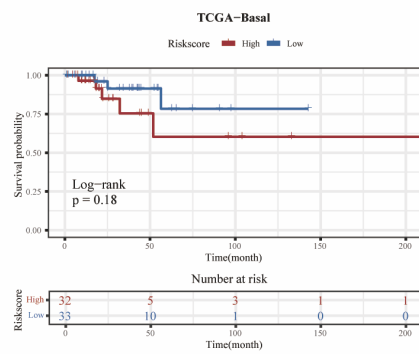

B

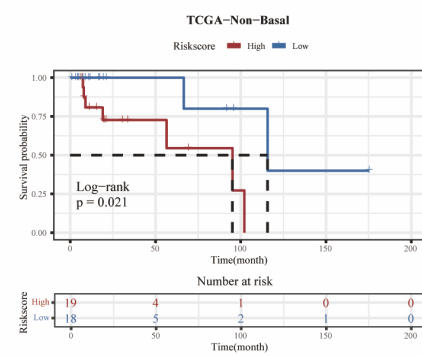

**Figure S1.** Kaplan-Meier survival curves for overall survival (OS) were stratified by GRS risk groups in (A) TCGA-Basal and (B) TCGA-Non-Basal cohorts.
