# Supplementary material for: Glycosylation profiling of triple-negative breast cancer: clinical and immune correlations and identification of LMAN1L as a biomarker and therapeutic target
Source: Frontiers journal article supplement (doi:10.3389/fimmu.2024.1521930), 2025-01-10
Supplement: Table_1.xls [file Table_1.xls]

## Sheet: Supplementary Table S1
Supplementary Table S1	A list of 481 genes as glycosylation-related genes (GRGs)
gene
A4GALT
A4GNT
ABO
ALG1
ALG10
ALG10B
ALG11
ALG12
ALG13
ALG14
ALG1L2
ALG2
ALG3
ALG5
ALG6
ALG8
ALG9
B3GALNT1
B3GALNT2
B3GALT1
B3GALT2
B3GALT4
B3GALT5
B3GALT6
B3GAT1
B3GAT2
B3GAT3
B3GLCT
B3GNT2
B3GNT3
B3GNT4
B3GNT5
B3GNT6
B3GNT7
B3GNT8
B3GNT9
B4GALNT2
B4GALT1
B4GALT2
B4GALT3
B4GALT4
B4GALT5
B4GALT6
B4GALT7
B4GAT1
C1GALT1
C1GALT1C1
CHPF
CHPF2
CHST10
CHST11
CHST12
CHST13
CHST14
CHST15
CHST3
CHST4
CHST7
CHST8
CHST9
CHSY1
CSGALNACT1
CSGALNACT2
DPAGT1
DPM1
DPM2
DPM3
DPY19L1
DPY19L2
DPY19L3
DPY19L4
EOGT
EXT1
EXT2
EXTL1
EXTL2
EXTL3
FKRP
FKTN
FUT1
FUT10
FUT11
FUT2
FUT3
FUT4
FUT5
FUT6
FUT7
FUT8
FUT9
GAL3ST1
GAL3ST2
GAL3ST3
GAL3ST4
GALNT1
GALNT10
GALNT11
GALNT12
GALNT13
GALNT14
GALNT15
GALNT16
GALNT17
GALNT18
GALNT2
GALNT3
GALNT4
GALNT5
GALNT6
GALNT7
GALNT8
GALNT9
GBGT1
GCNT1
GCNT2
GCNT3
GCNT4
GCNT7
GXYLT1
GXYLT2
HS2ST1
HS3ST1
HS3ST2
HS3ST3A1
HS3ST3B1
HS3ST4
HS3ST5
HS3ST6
HS6ST1
HS6ST2
HS6ST3
LARGE1
LARGE2
MGAT1
MGAT2
MGAT3
MGAT4A
MGAT4B
MGAT4C
MGAT5
MGAT5B
MPDU1
NDST1
NDST2
NDST3
NDST4
OGT
PLOD3
POFUT1
POFUT2
POGLUT1
POMGNT1
POMGNT2
POMK
POMT1
POMT2
RXYLT1
SLC35C1
SLC35D2
ST3GAL1
ST3GAL2
ST3GAL3
ST3GAL4
ST3GAL5
ST3GAL6
ST6GAL1
ST6GAL2
ST6GALNAC1
ST6GALNAC2
ST6GALNAC3
ST6GALNAC4
ST6GALNAC5
ST6GALNAC6
ST8SIA1
ST8SIA2
ST8SIA3
ST8SIA4
ST8SIA5
ST8SIA6
STT3A
STT3B
TMTC1
TMTC2
TMTC3
TMTC4
UGGT1
UGGT2
UST
XXYLT1
XYLT1
XYLT2
ABCA2
ACER2
ADAMTS12
ADAMTS13
ADAMTS7
AMFR
ARFGEF1
BGN
C1GALT1C1L
CHP1
COG3
COG7
CRPPA
DAD1
DCN
DDOST
DERL3
DHDDS
DOLK
DOLPP1
EDEM1
EDEM2
EDEM3
ENGASE
ENTPD5
GALNTL6
GANAB
GFPT1
GFPT2
GLB1
GMPPB
GOLGA2
GORASP1
GPC1
HEXA
HEXB
IL15
KRTCAP2
MAGT1
MAN1A1
MAN1A2
MAN1B1
MAN1C1
MAN2A1
MAN2A2
MAN2B1
MARCHF6
MGAT4D
MLEC
MOGS
MT3
NEU2
NEU4
NGLY1
NUDT14
NUS1
OGA
OST4
OSTC
PGM3
PMM1
PMM2
POGLUT2
POGLUT3
PRKCSH
PSEN1
RAB1A
RAB1B
RAMP1
RFT1
RNF103
RNF139
RNF185
RNF5
RPN1
RPN2
SLC35C2
SLC39A8
SLC51B
SRD5A3
SYVN1
TET1
TET2
TET3
TMEM165
TMEM258
TMEM59
TRAK1
TRIM13
TUSC3
UBE2J1
VEGFB
A3GALT2
B4GALNT1
GLT6D1
PIGB
PIGM
PIGV
PIGZ
COG1
COG2
COG4
COG5
COG6
COG8
FUOM
GBA2
NANS
PIGA
PIGC
PIGF
PIGH
PIGL
PIGP
PIGQ
PIGU
PIGW
PIGX
PIGY
UGCG
UGT8
FUCA1
NEU1
NEU3
CHST1
CHST2
CHST5
CHST6
HAS1
HAS2
HAS3
MAN2C1
SLC35A3
AMDHD2
CMAS
GNE
GNPNAT1
NAGK
NANP
NPL
RENBP
UAP1
FCSK
GALT
GFUS
GMDS
MPI
FPGT
GYG1
GYG2
GYS1
INS
SLC35A2
SLC35B4
GALE
GALK1
PGM1
PKM
SLC35A1
SLC35D1
APP
TH
AGER
EPHA5
LIN28A
NCF1
SRI
CD55
MAPK1
MAPK3
UGT1A6
APOB
EDN1
HMGB1
NOTCH1
SCGB1A1
SPON2
UMOD
ZC3H12A
HSPA5
THBS1
GPC3
DAG1
ART1
B4GALNT3
B4GALNT4
COLGALT1
COLGALT2
LFNG
MFNG
RFNG
UGT3A1
ARF4
B3GNTL1
MANEA
ASGR1
ASGR2
LMAN1
LMAN1L
LMAN2
LMAN2L
PLOD1
PLOD2
ACAN
ADAMTS1
ADAMTS15
ADAMTS3
ADAMTS5
ADAMTS8
ADAMTSL5
AGRN
BCAN
LRPAP1
NCAN
PRELP
SAA1
SEMA5A
THBS2
VCAN
GALNTL5
CALR
CANX
CKAP4
DERL1
DERL2
DNAJC3
ERP29
HYOU1
OS9
PDIA3
PREB
RAD23B
SAR1B
SEC13
SEC23A
SEC24A
SEC24B
SEC24C
SEC24D
SEC31A
SEC61A1
SEC61A2
SEC61B
SEC61G
SEC62
SEC63
SEL1L
SSR4
SVIP
UBXN1
VCP
GMPPA
SRP9
SRPRA
SRPRB
BET1
BET1L
GOSR1
GOSR2
SEC22B
STX17
STX5
YKT6
ARSB
CAD
NAT8L
HSPG2
SDC1
SDC4
ANK1
ANK2
ANK3
LUM
SDC2
RPS27A
UBA1
UBA52
UBB
UBC
PSMC1
SDC3
RP9
CA8
DPAGT2
GALNT19
GAS1
GAS2
GGTA1
TMEM260
VPS13B

## Sheet: Supplementary Table S2
Supplementary Table S2	A list of 35 genes as glycosylation-related signature (GRS)
Gene
ALG3
CHST7
FUT2
FUT7
GALNT13
GALNT8
GCNT2
HS6ST3
ST3GAL4
XXYLT1
ADAMTS7
BGN
DERL3
MAN1A1
MAN1C1
MT3
NEU4
RPN1
SRD5A3
VEGFB
CHST1
HAS3
CMAS
GMDS
NCF1
SCGB1A1
B4GALNT4
MFNG
LMAN1L
ACAN
ADAMTS8
BCAN
SRPRB
ANK2
GAS2

## Sheet: Supplementary Table S3
Supplementary Table S3	The sequences of siRNA oligonucleotides in this study
siLMAN1L-1-sense（5'-3'）	ACGGCAUCGGGAUCUUCUUTT
siLMAN1L-1-antisense（5'-3'）	AAGAAGAUCCCGAUGCCGUTT
siLMAN1L-2-sense（5'-3'）	GUCACUCAAUAAGGACUCUTT
siLMAN1L-2-antisense（5'-3'）	AGAGUCCUUAUUGAGUGACTT

## Sheet: Supplementary Table S4 
Supplementary Table S4	Real-time PCR primer sequences in this study
MAN1A1-F	GTGGACAGTGGGGTCAACAT
MAN1A1-R	GCTGCTAGACTTGCGGATCA
LMAN1L-F	GGTGTCCTCCTCTACGCAG
LMAN1L-R	CCACTCCGGTTCCTCATGG
DERL3-F	AGGTCTGGAGGCTCGTCAC
DERL3-R	GCAGTAGCGGAACACGAAGAG
CHST1-F	ACCTGGCTCGGAACCCTAT
CHST1-R	CGGTGCCGTATTTGTGCTTG
HS6ST3-F	AACATCACGCGGGCTTCTAAC
HS6ST3-R	GCATACTCGTAAAGCTGCATGTC
FUT2-F	ATCATGACCATTGGGACGTT
FUT2-R	GTGCTTGAGTAAGGGGGACA
BCAN-F	GCCCCAACGACTCAGGTATC
BCAN-R	CAGAGCCCTCTCGGTAGAGAA
XXYLT1-F	CATGTGCTGGACTGTACCTGG
XXYLT1-R	GGCCCTCACACCTGAAATAGG
VEGFB-F	GACATCACCCATCCCACTCCA
VEGFB-R	TCTGAAAAGCCATGTGTCACC
FUT7-F	CACCTGAGTGCCAACCGAA
FUT7-R	CACCCAGTTGAAGATGCCTCG
ALG3-F	TCATGTGCTGCGCCTCTTAC
ALG3-R	GCAGGAGGTTGATACTGAGGA
CHST7-F	CTTCCTGGGCGAACTCTTTAAC
CHST7-R	GATACAGCGCCTGCCATAGA
BGN-F	GAGACCCTGAATGAACTCCACC
BGN-R	CTCCCGTTCTCGATCATCCTG
MFNG-F	TGCTGAGTTCGACACCTTCTT
MFNG-R	GCCCTTGGGTTCACATAGTTG
GCNT2-F	TGTTCCTGGCTCTATGCCAAA
GCNT2-R	TTAGCAAACAGGCTTGGTGAAT
GALNT13-F	TTGCCCTTAATAGAAGTCTGCCA
GALNT13-R	TGGGGAACGATTTATCACACTG
GAS2-F	TTAGGGAAGGAGATTACAGCAGA
GAS2-R	TCTCGGCACCAGGATAAGAAA
B4GALNT4-F	GAAGATCCGTAAGCAGATGAAGC
B4GALNT4-R	ACGGCTCTCACTGGAGTCC
SRD5A3-F	TGGCTGCACAGCTTACGAAG
SRD5A3-R	TCAGCACAGTTAGGCCAACAA
NEU4-F	GGCCACGGGATGACAGTTG
NEU4-R	CAGGCGGATACCCATGTGTAG
SCGB1A1-F	TTCAGCGTGTCATCGAAACCC
SCGB1A1-R	ACAGTGAGCTTTGGGCTATTTTT
